# Supplementary material for: InSite: a computational method for identifying protein-protein interaction binding sites on a proteome-wide scale
Source: Springer Nature journal article supplement (doi:10.1186/gb-2007-8-9-r192), 2007-09-14
Supplement: 13059_2007_1673_MOESM2_ESM.pdf [file 13059_2007_1673_MOESM2_ESM.pdf]

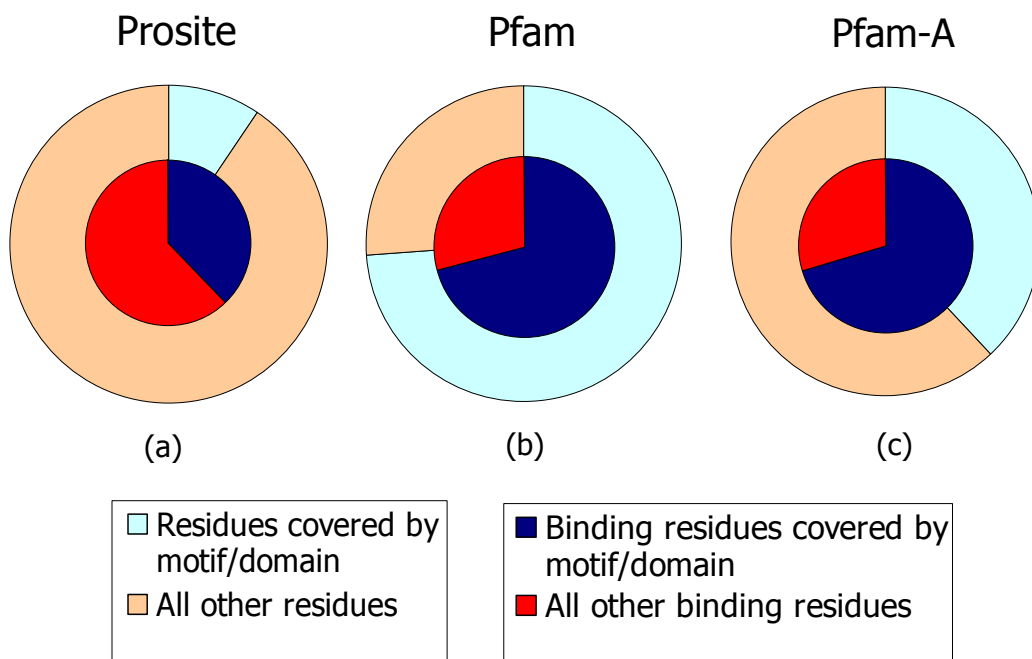

**Supplementary Figure S1**

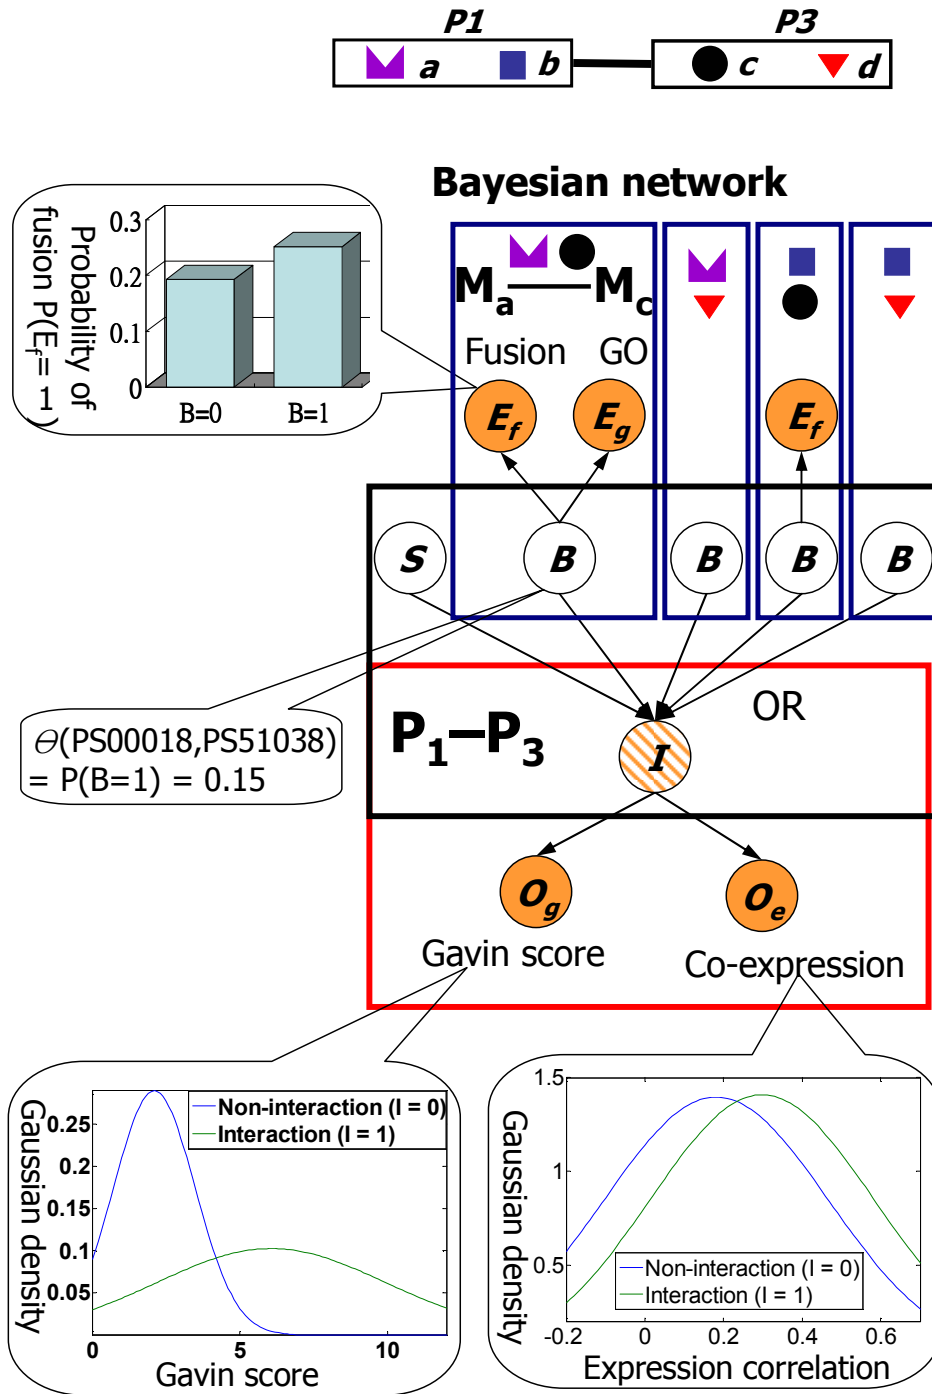

**Supplementary Figure S2**

# EM Learning algorithm

Observed: **O**, **E**, partial **I**

Hidden: **B**, **S**, partial **I**

**Repeat:**

Estimation of:

- motif affinities ( $\theta$ )
- noisy observation models ( $\eta$ )
  - protein-protein interactions
  - domain-domain interactions

**E step**

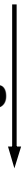

**M step**

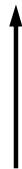

Soft assign to:

- **B**, **S**, **I**

**Supplementary Figure S3**

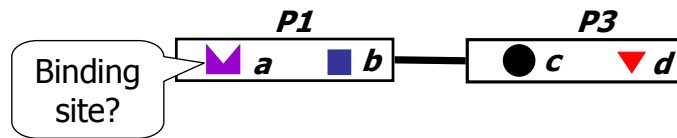

**Bayesian network**

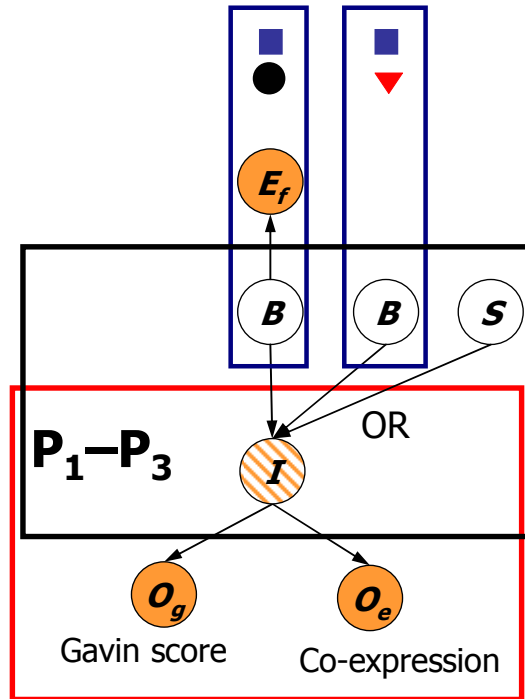

**Supplementary Figure S4**

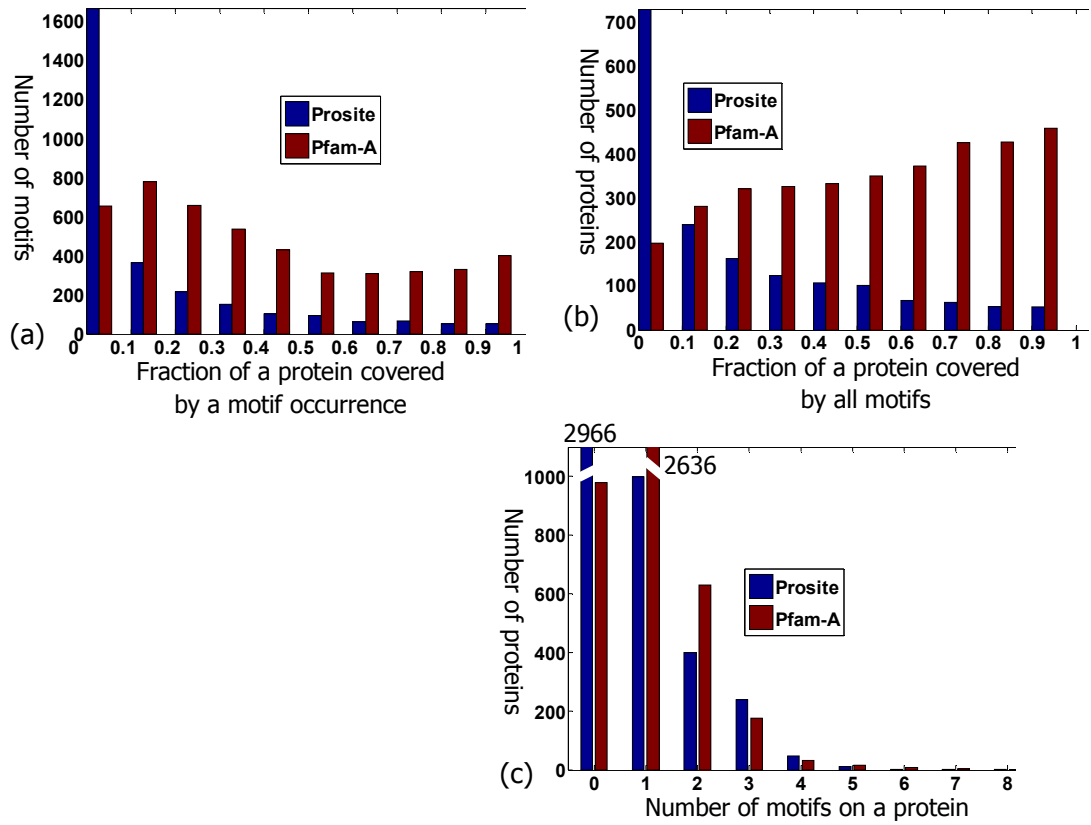

**Supplementary Figure S5**

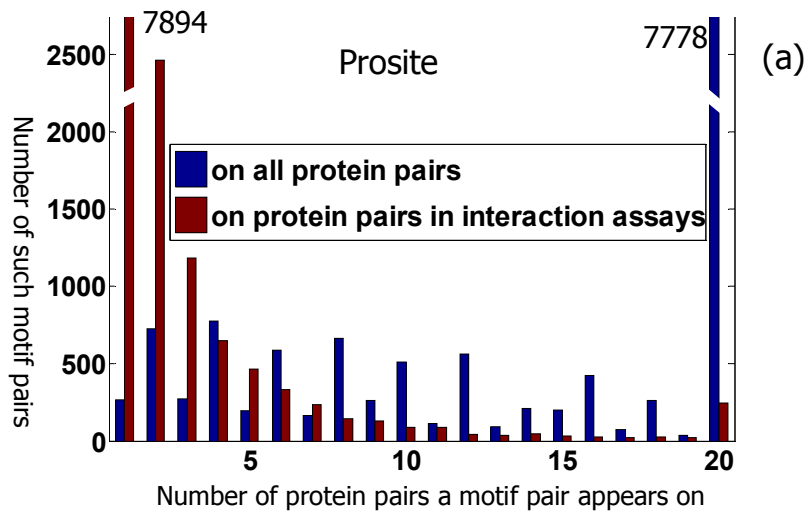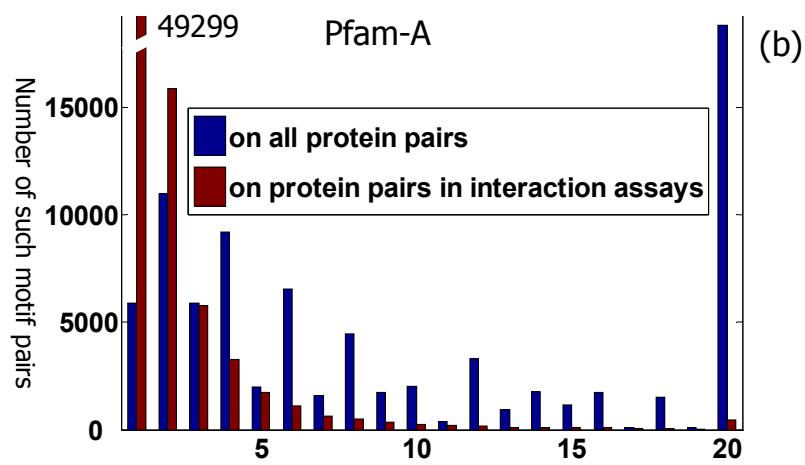

**Supplementary Figure S6**

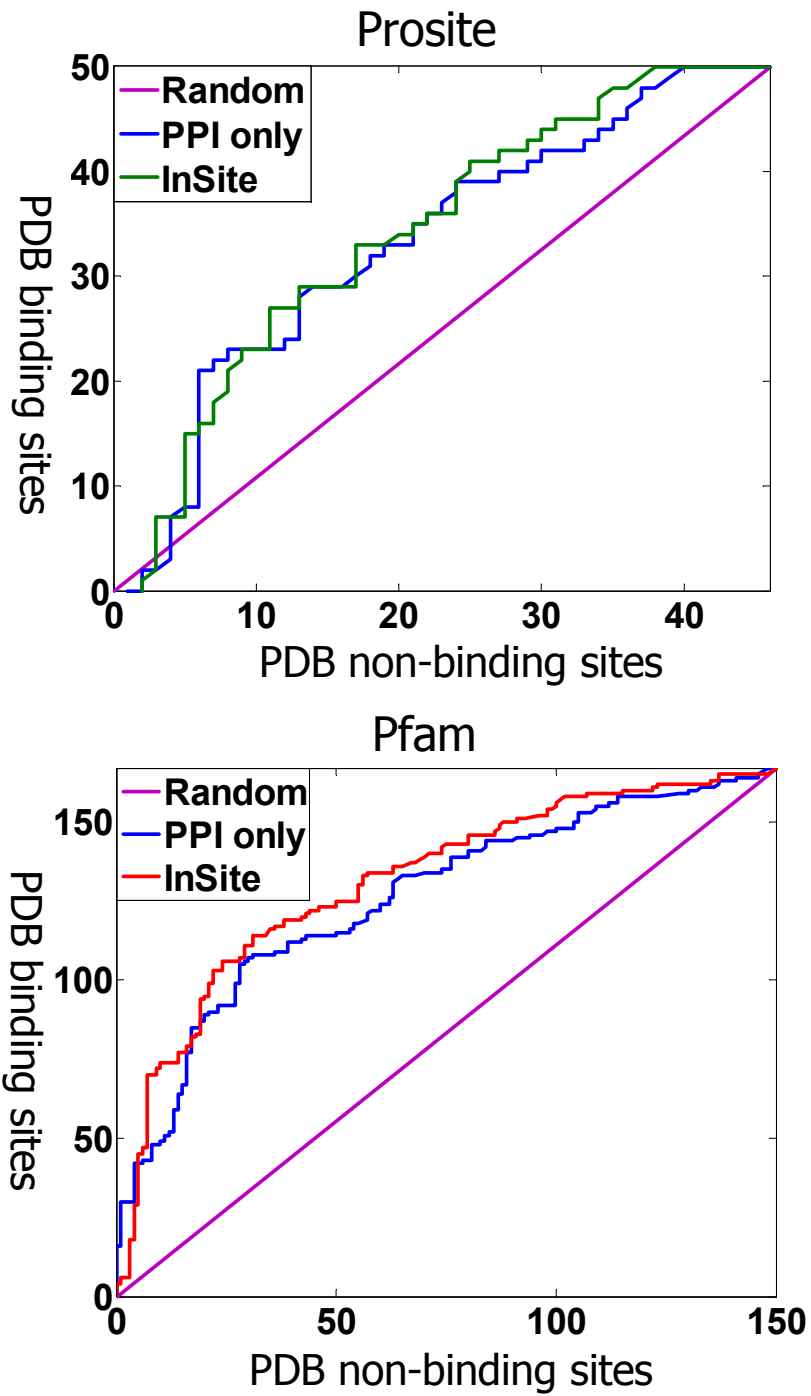

**Supplementary Figure S7**

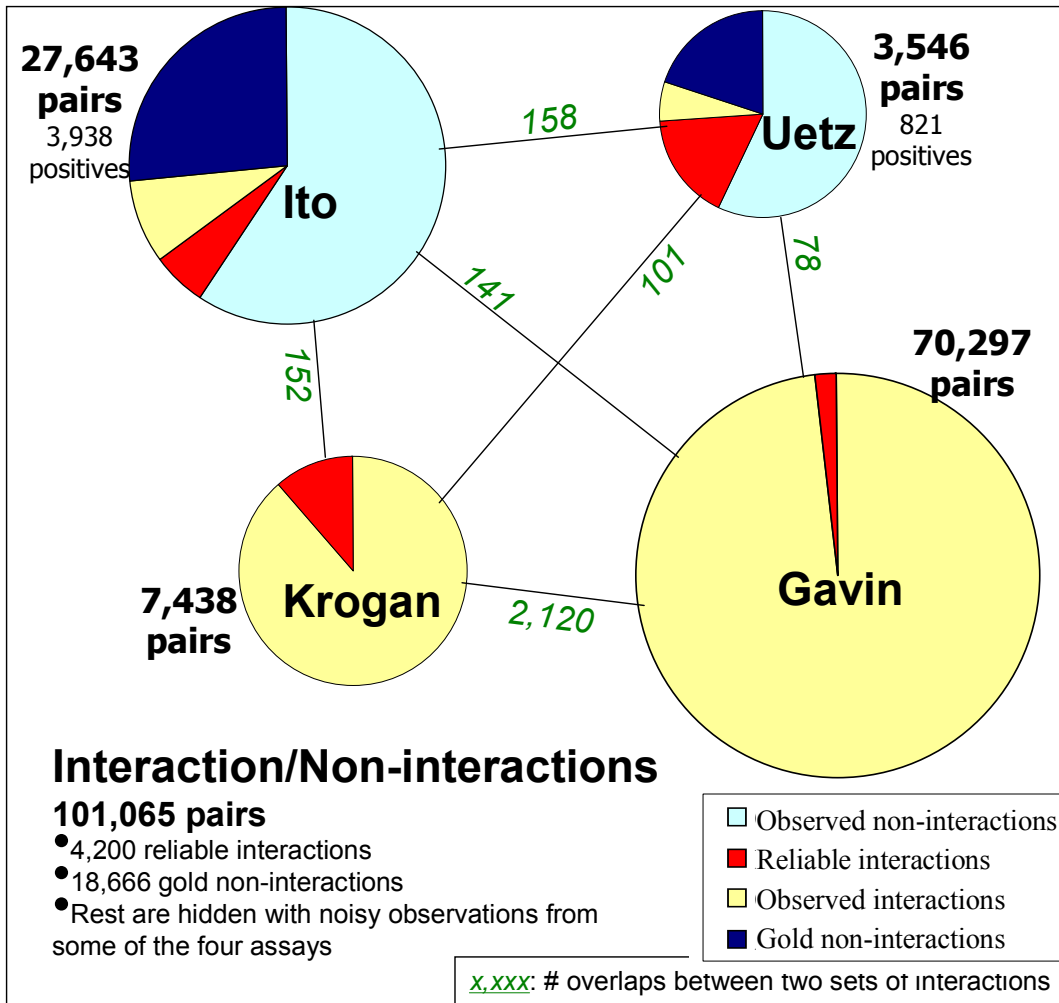

**Supplementary Figure S8**
